# Supplementary material
Source: Springer Nature journal article supplement (https://www.springermedizin.de/resource/supplementary/13012_2011_504_MOESM2_ESM.pdf/9630172)
Supplement: MOESM2 [file 9630172]

Following to be completed by the local investigator -

- Patient ID No.
- Ward/Day Unit No.
- Site No.
- Time Point

| PATIENT ID NO.       |                      |                      |                      | WARD/DAY UNIT NO.    |                      | SITE NO.             |                      |
|----------------------|----------------------|----------------------|----------------------|----------------------|----------------------|----------------------|----------------------|
| <input type="text"/> | <input type="text"/> | <input type="text"/> | <input type="text"/> | <input type="text"/> | <input type="text"/> | <input type="text"/> | <input type="text"/> |
| c0>                  | c0>                  | c0>                  | c0>                  | c0>                  | c0>                  | c0>                  | c0>                  |
| c1>                  | c1>                  | c1>                  | c1>                  | c1>                  | c1>                  | c1>                  | c1>                  |
| c2>                  | c2>                  | c2>                  | c2>                  | c2>                  | c2>                  | c2>                  | c2>                  |
| c3>                  | c3>                  | c3>                  | c3>                  | c3>                  | c3>                  | c3>                  | c3>                  |
| c4>                  | c4>                  | c4>                  | c4>                  | c4>                  | c4>                  | c4>                  | c4>                  |
| c5>                  | c5>                  | c5>                  | c5>                  | c5>                  | c5>                  | c5>                  | c5>                  |
| c6>                  | c6>                  | c6>                  | c6>                  | c6>                  | c6>                  | c6>                  | c6>                  |
| c7>                  | c7>                  | c7>                  | c7>                  | c7>                  | c7>                  | c7>                  | c7>                  |
| c8>                  | c8>                  | c8>                  | c8>                  | c8>                  | c8>                  | c8>                  | c8>                  |
| c9>                  | c9>                  | c9>                  | c9>                  | c9>                  | c9>                  | c9>                  | c9>                  |

TIME POINT

T1  T2  T3  T4  T5  T6  T7  T8

# PoISE - PATIENT QUESTIONNAIRE

## INSTRUCTIONS

- This form will be read by a machine
- Use an HB pencil or black pen
- Mark like this

1. When were you given information about when to **stop eating and drinking** (fast) for your operation? (Please mark **all** that apply).

- The hospital sent me some information before I came into hospital (e.g. with the letter giving you a date for your operation).
- At the pre operative assessment clinic\*.
- Once I was admitted to the hospital ward for my operation.
- Other please specify:

*\*A pre operative assessment clinic is an outpatient clinic where you are assessed for your operation. This is not usually the clinic when the specialist sees you to decide what is wrong and what treatment you need.*

Please rate how much you agree or disagree with the following statements. Please mark **ONE** option for each statement.

|                                                                                                                           | Strongly agree           | Agree                    | Neither agree nor disagree | Disagree                 | Strongly disagree        | Don't remember           |
|---------------------------------------------------------------------------------------------------------------------------|--------------------------|--------------------------|----------------------------|--------------------------|--------------------------|--------------------------|
| 2. Different healthcare staff gave me different information about when I should stop <b>eating</b> before my operation.   | <input type="checkbox"/> | <input type="checkbox"/> | <input type="checkbox"/>   | <input type="checkbox"/> | <input type="checkbox"/> | <input type="checkbox"/> |
| 3. I felt clear about when I should stop <b>eating</b> before my operation.                                               | <input type="checkbox"/> | <input type="checkbox"/> | <input type="checkbox"/>   | <input type="checkbox"/> | <input type="checkbox"/> | <input type="checkbox"/> |
| 4. I felt hungry while I was not <b>eating</b> before my operation.                                                       | <input type="checkbox"/> | <input type="checkbox"/> | <input type="checkbox"/>   | <input type="checkbox"/> | <input type="checkbox"/> | <input type="checkbox"/> |
| 5. I felt thirsty while I was not <b>drinking</b> before my operation.                                                    | <input type="checkbox"/> | <input type="checkbox"/> | <input type="checkbox"/>   | <input type="checkbox"/> | <input type="checkbox"/> | <input type="checkbox"/> |
| 6. Different healthcare staff gave me different information about when I should stop <b>drinking</b> before my operation. | <input type="checkbox"/> | <input type="checkbox"/> | <input type="checkbox"/>   | <input type="checkbox"/> | <input type="checkbox"/> | <input type="checkbox"/> |
| 7. I felt confused about when I should stop <b>drinking</b> before my operation.                                          | <input type="checkbox"/> | <input type="checkbox"/> | <input type="checkbox"/>   | <input type="checkbox"/> | <input type="checkbox"/> | <input type="checkbox"/> |
| 8. I felt thirsty after my operation.                                                                                     | <input type="checkbox"/> | <input type="checkbox"/> | <input type="checkbox"/>   | <input type="checkbox"/> | <input type="checkbox"/> | <input type="checkbox"/> |
| 9. I was given a drink after my operation as soon as I felt I wanted one.                                                 | <input type="checkbox"/> | <input type="checkbox"/> | <input type="checkbox"/>   | <input type="checkbox"/> | <input type="checkbox"/> | <input type="checkbox"/> |

DO NOT WRITE IN THIS SHADED AREA

**If you are currently taking any daily medication please answer question 10. If not, please tick the N/A box and go to question 11.**

|                                                                                               | Yes                      | No                       | Don't Know               | N/A                      |
|-----------------------------------------------------------------------------------------------|--------------------------|--------------------------|--------------------------|--------------------------|
| 10. I had all my medication as usual while I was not eating and drinking before my operation. | <input type="checkbox"/> | <input type="checkbox"/> | <input type="checkbox"/> | <input type="checkbox"/> |

11. While you were not eating and drinking before your operation did you do any of the following? (Please mark any that apply).

- |                                             |                                             |                                                             |
|---------------------------------------------|---------------------------------------------|-------------------------------------------------------------|
| <input type="checkbox"/> Sucked an ice cube | <input type="checkbox"/> Chewed gum         | <input type="checkbox"/> Cleaned my teeth                   |
| <input type="checkbox"/> Had sips of water  | <input type="checkbox"/> Ate a sweet/sweets | <input type="checkbox"/> Used lip moisturiser (e.g. lipsil) |
| <input type="checkbox"/> Used mouthwash     | <input type="checkbox"/> Ate something else | <input type="checkbox"/> Had a drink                        |

12. Did you choose to stop eating or drinking before your operation at different times from those recommended by the staff looking after you?

- Yes If yes, please tell us the reason for your decision
- No

**If your operation was delayed\* please answer questions 13 and 14. If not, please go to question 15.**

*\*Delayed here means you still had your operation on the planned day but it was later than you were originally told you would go to theatre.*

|                                                                                                                 | Strongly agree           | Agree                    | Neither agree nor disagree | Disagree                 | Strongly disagree        |
|-----------------------------------------------------------------------------------------------------------------|--------------------------|--------------------------|----------------------------|--------------------------|--------------------------|
| 13. I was happy about the way staff kept me up to date about what was happening when my operation was delayed.  | <input type="checkbox"/> | <input type="checkbox"/> | <input type="checkbox"/>   | <input type="checkbox"/> | <input type="checkbox"/> |
| 14. I was not given clear information about whether I could <b>drink</b> whilst I was waiting for my operation. | <input type="checkbox"/> | <input type="checkbox"/> | <input type="checkbox"/>   | <input type="checkbox"/> | <input type="checkbox"/> |

15. Do you have any medical condition that can be affected by not eating or drinking (e.g. diabetes).

- Yes, **Please answer Q16 &17**
- No, **You don't need to answer any more questions. Thank you for completing this questionnaire.**

**If you answered yes to question 15 above, please answer overall how you felt your condition(s) was/were treated.**

|                                                                        | Strongly agree           | Agree                    | Neither agree nor disagree | Disagree                 | Strongly disagree        |
|------------------------------------------------------------------------|--------------------------|--------------------------|----------------------------|--------------------------|--------------------------|
| 16. Staff discussed treatment decisions about my condition(s) with me. | <input type="checkbox"/> | <input type="checkbox"/> | <input type="checkbox"/>   | <input type="checkbox"/> | <input type="checkbox"/> |

17. If you would like to tell us what condition or conditions you have that are affected by not eating and drinking, please write them here.

**Thank you for taking part in this research study and completing this questionnaire. Please put it in the envelope and put it in the collection box on the ward.**

S22284/R07/1106
